# Supplementary material for: A novel approach for sports injury risk prediction: based on time-series image encoding and deep learning
Source: Front Physiol. 2023 Dec 18;14:1174525. doi: 10.3389/fphys.2023.1174525 (PMC10773721; doi:10.3389/fphys.2023.1174525)
Supplement: Supplementary file 2 [file Table1.XLSX]

## Sheet: DCAE
Model:	DCAE
Layer	(type)	units	filters	kernel_size	strides	padding	activation functions	Output Shape	Param
Input	(InputLayer)	—	—	—	—	—	—	(None,640)
reshape_1	(Reshape)	—	—	—	—	—	—	(None,8, 8, 10)	0
conv2d_1	(Conv2D)	—	64	(2,2)	1	same	selu	(None,8, 8, 64)	2624
conv2d_2	(Conv2D)	—	16	(2,2)	1	same	selu	(None,8,8,16)	4112
max_pooling2d_1	(MaxPooling2	—	—	—	—	—	—	(None,4,4,16)	0
flatten_1	(Flatten)	—	—	—	—	—	—	(None,256)	0
dense_1	(Dense)	64	—	—	—	—	None	(None,64)	16448
dense_2	(Dense)	5	—	—	—	—	None	(None,5)	325
dense_3	(Dense)	64	—	—	—	—	None	(None,64)	384
dense_4	(Dense)	256	—	—	—	—	None	(None,256)	16640
reshape_2	(Reshape)	—	—	—	—	—	—	(None,4,4,16)	0
up_sampling2d_1	(UpSampling2	—	—	—	—	—	—	(None,8,8,16)	0
conv2d_3	(Conv2D)	—	16	(2,2)	1	same	selu	(None,8,8,16)	1040
conv2d_4	(Conv2D)	—	64	(2,2)	1	same	selu	(None,8, 8, 64)	4160
conv2d_5	(Conv2D)	—	10	(2,2)	1	same	tanh	(None,8, 8, 10)	2570
flatten_2	(Flatten)	—	—	—	—	—	—	(None,640)	0
Total params:		48303
Trainable params:		48303
Non-trainable params:		0
optimizer		adadelta
learning rate		0.01
epochs		100
batch_size		512
loss function		mean square error

## Sheet: DNN
Model:	DNN
Layer	(type)	units	ratio	activation functions	Output Shape	Param
Input	(InputLayer)	50	—	selu	(None,50)	300
batch_normalization_1	(Batch)	—	—	—	(None,50)	200
dropout_1	(Dropout)	—	0.3	—	(None,50)	0
dense_1	(dense)	50	—	selu	(None,50)	2550
batch_normalization_2	(Batch)	—	—	—	(None,50)	200
dropout_2	(Dropout)	—	0.3	—	(None,50)	0
dense_2	(dense)	50	—	selu	(None,50)	2550
batch_normalization_3	(Batch)	—	—	—	(None,50)	200
dropout_3	(Dropout)	—	0.3	—	(None,50)	0
dense_3	(dense)	50	—	selu	(None,50)	2550
batch_normalization_4	(Batch)	—	—	—	(None,50)	200
dropout_4	(Dropout)	—	0.3	—	(None,50)	0
output	(dense)	1	—	sigmoid	(None,1)	51
Total params:		8801
Trainable params:		8401
Non-trainable params:		400
optimizer		adadelta
learning rate		0.01
epochs		100
batch_size		512
loss function		focal loss (alpha:0.55, gamma:5)
